# Supplementary material for: Zinc Alpha-2-Glycoprotein (ZAG/AZGP1) secreted by triple-negative breast cancer promotes tumor microenvironment fibrosis
Source: PubMed Central journal article supplement — bioRxiv. 2024 Mar 7:2024.03.04.583349. Preprint. [Version 1] doi: 10.1101/2024.03.04.583349 (PMC10942361; doi:10.1101/2024.03.04.583349), 2024-03-07
Supplement: media-1.pdf [file media-1.pdf]

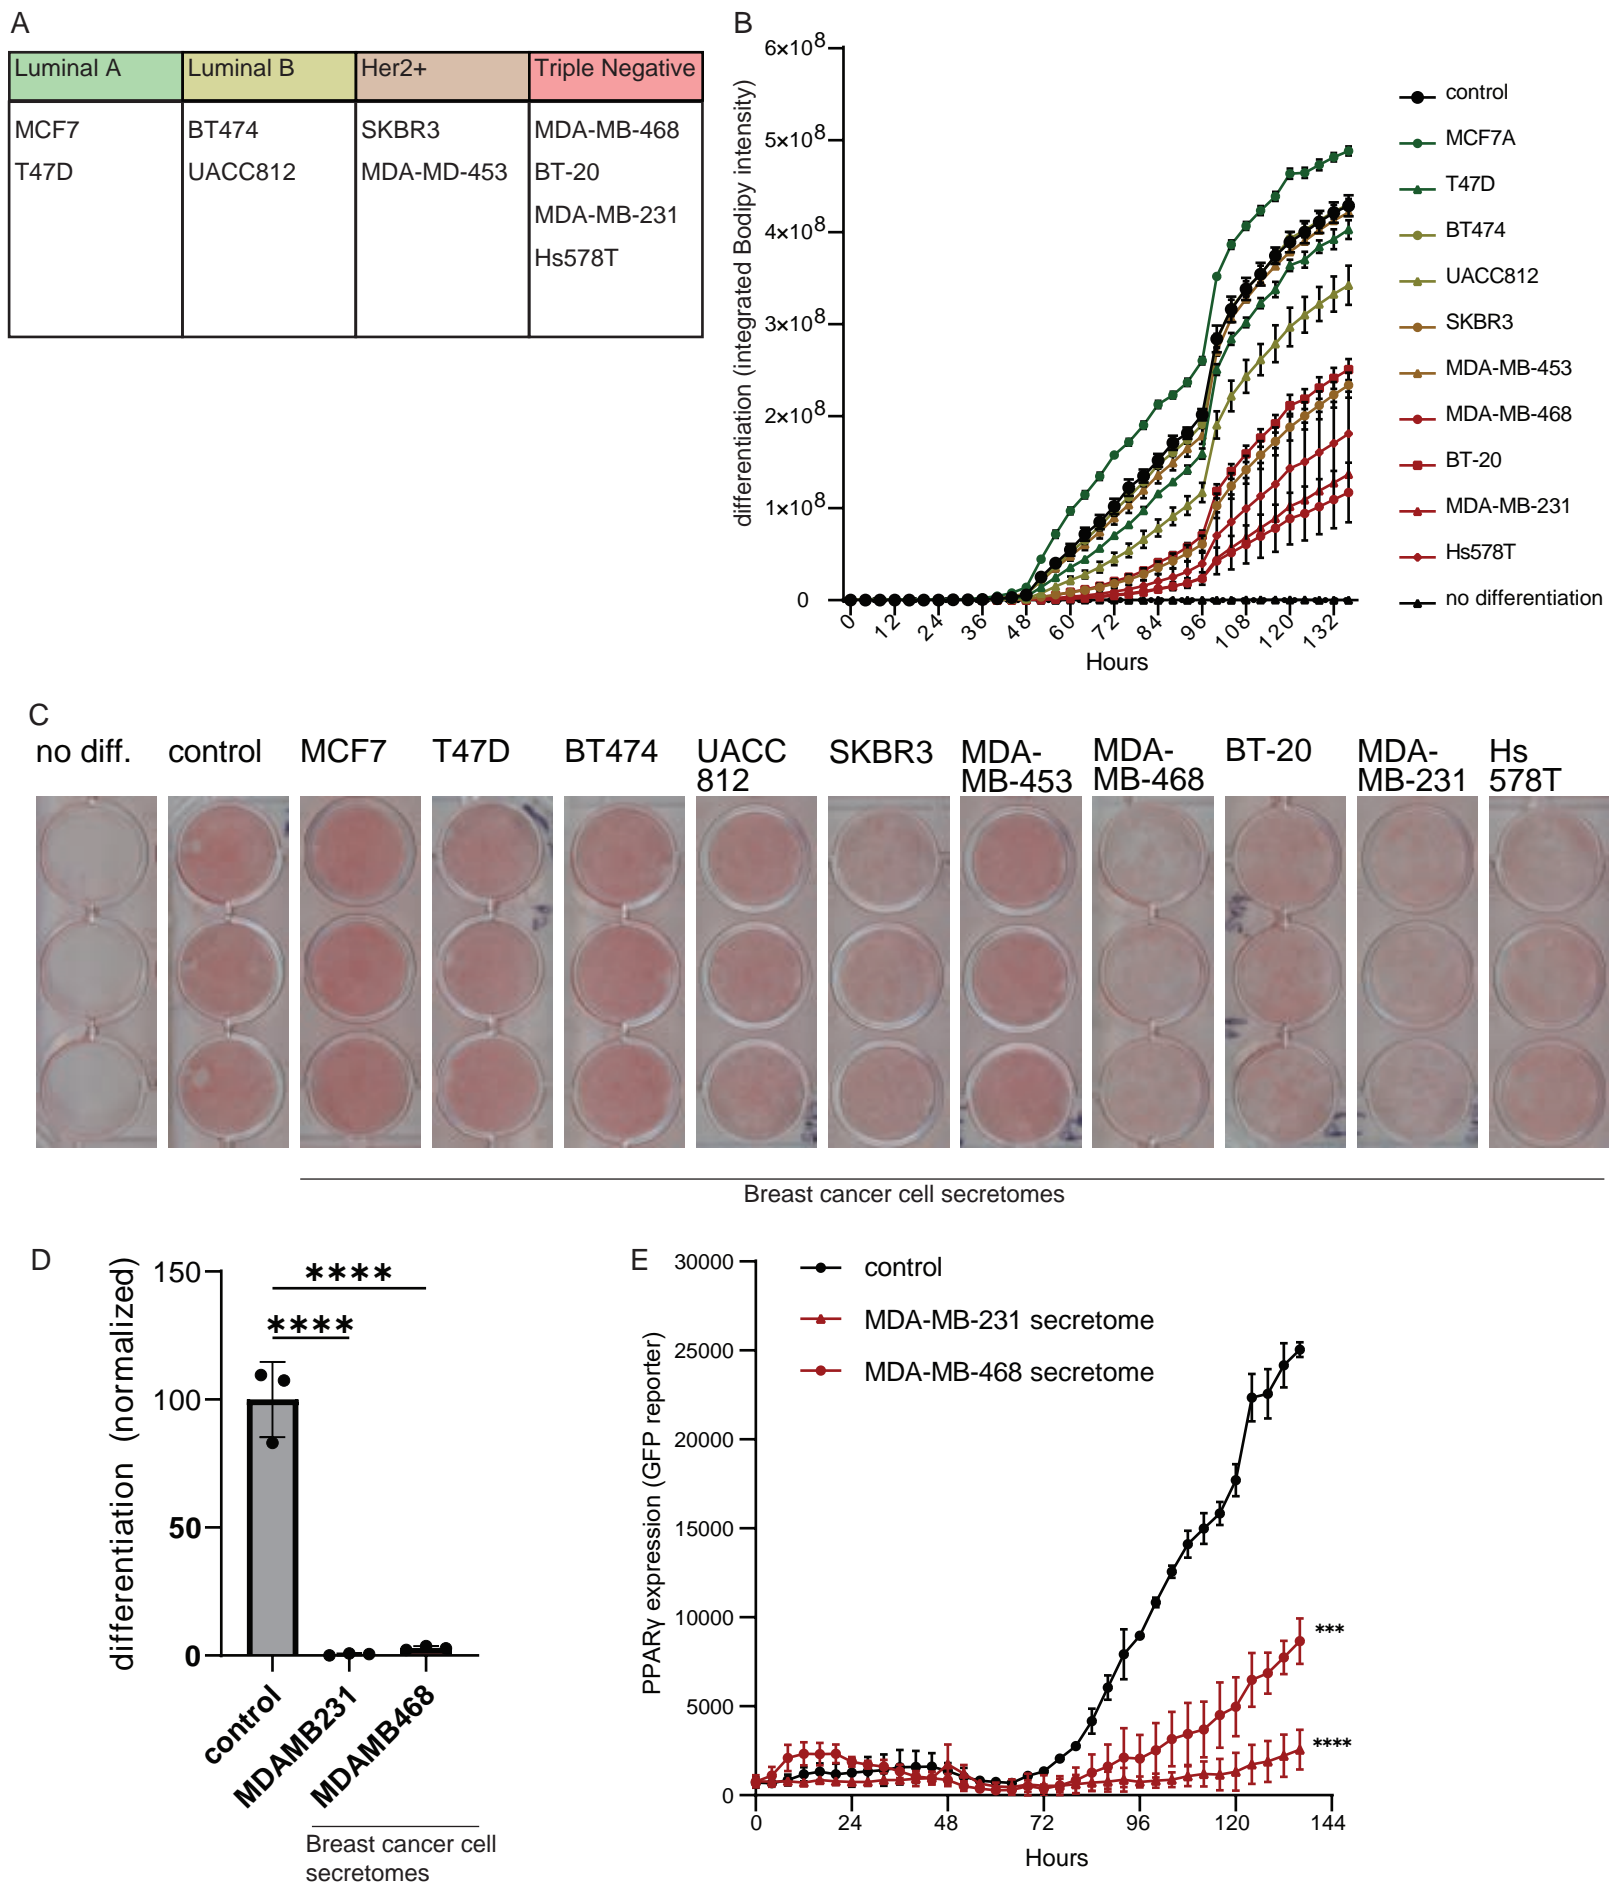

Figure S1

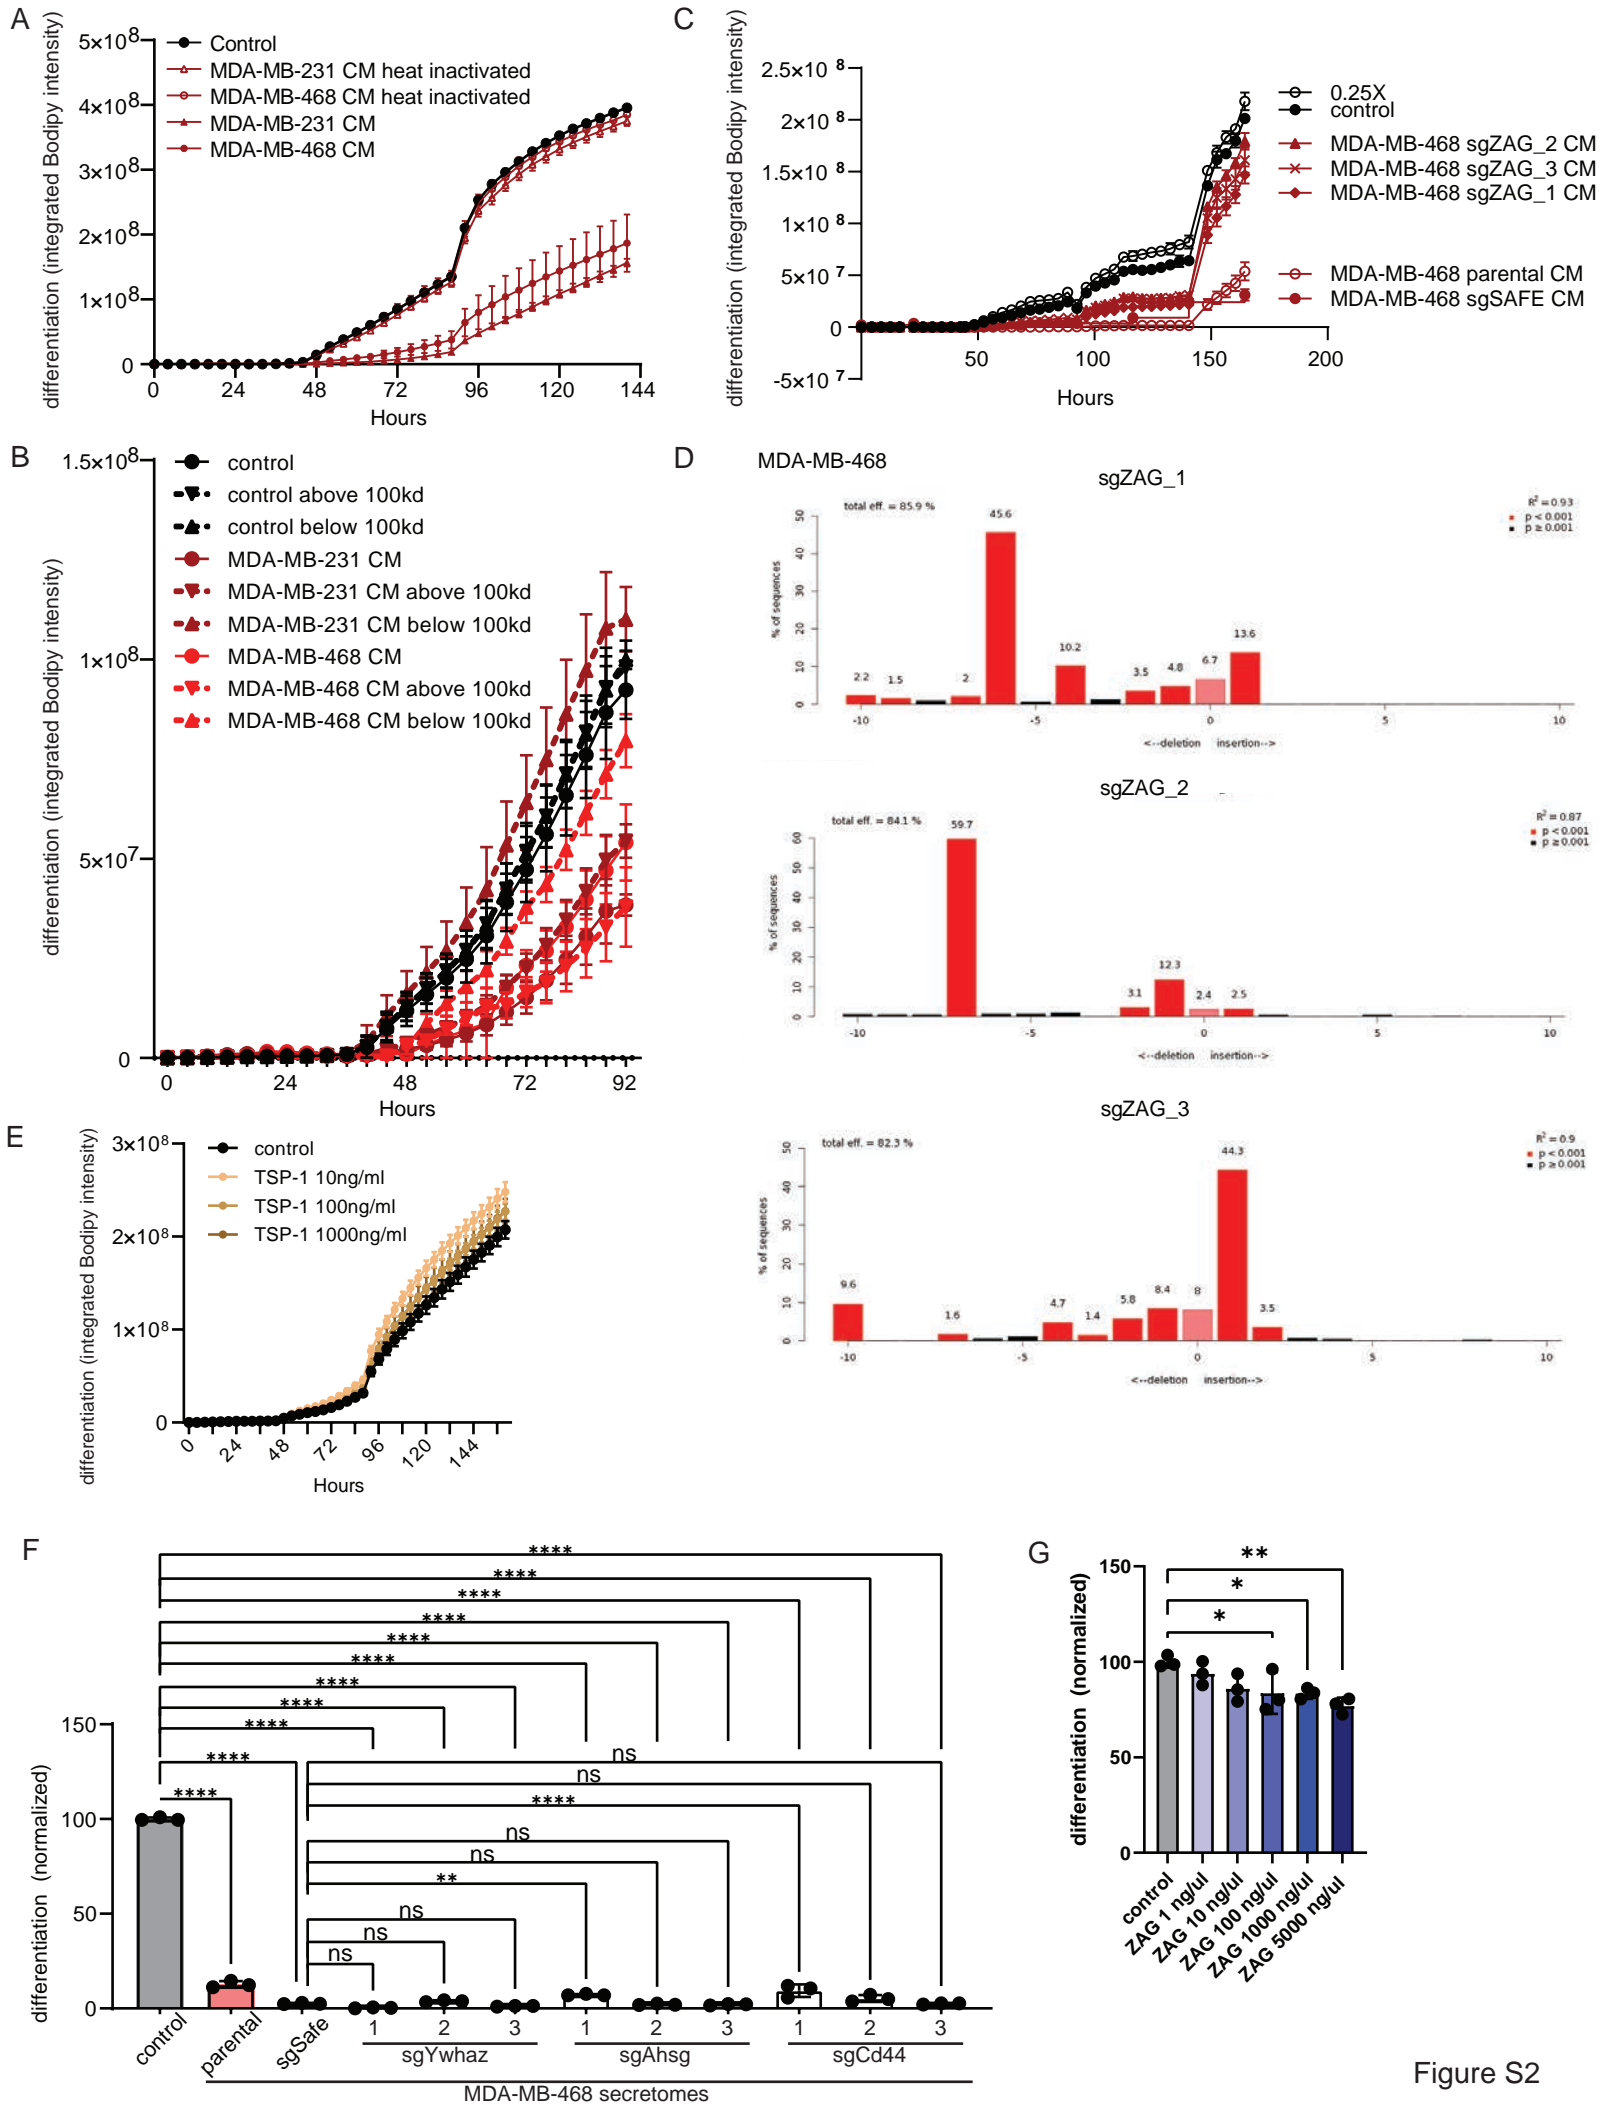

Figure S2

A

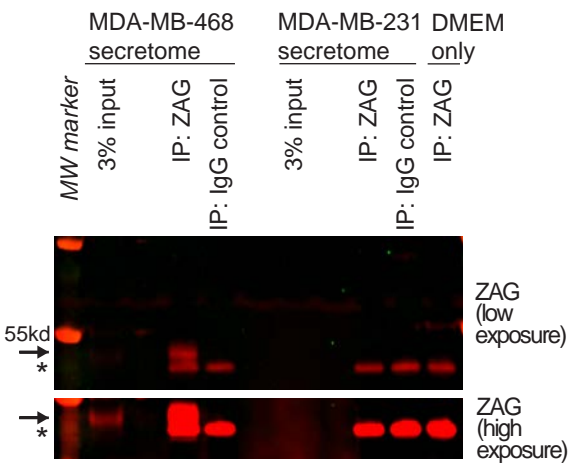

B

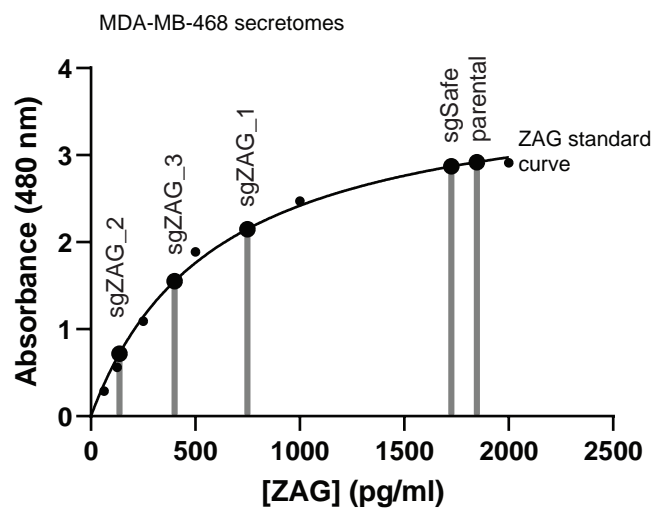

C Breast Cancer (TCGA) data set

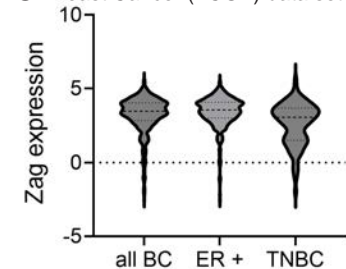

Breast Cancer (METABRIC) data set

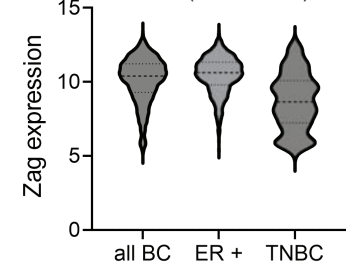

D

## Triple-negative Breast Cancer - survival by ZAG expression

Breast Invasive Carcinoma (TCGA, Nature 2012) data set  
Logrank Test p-value: 0.0108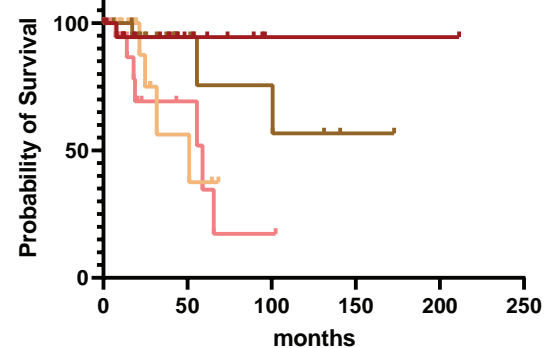Breast Cancer (METABRIC, Nature 2012 & Nat Commun 2016) data set  
Logrank Test p-value: 0.0870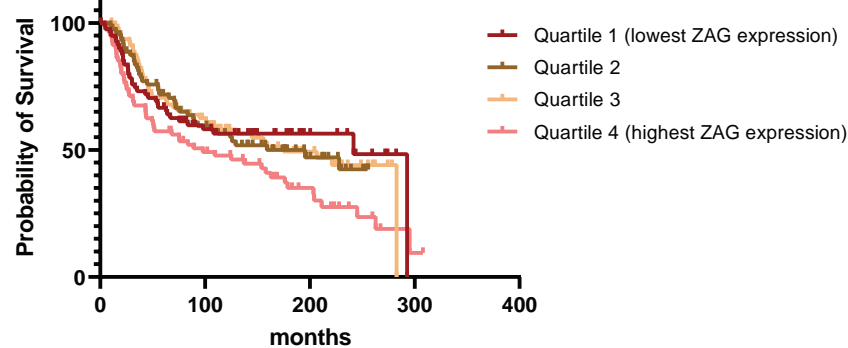

E

## ER-positive Breast Cancer - survival by ZAG expression

Breast Invasive Carcinoma (TCGA, Nature 2012) data set  
Logrank Test p-value: 0.0608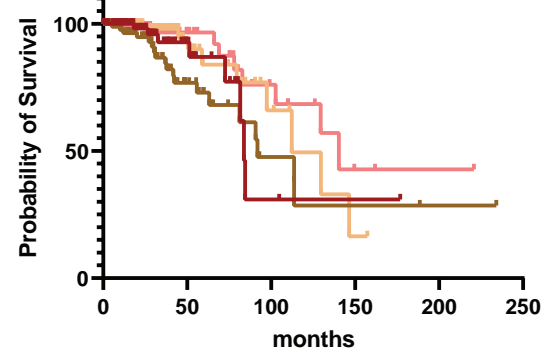Breast Cancer (METABRIC, Nature 2012 & Nat Commun 2016) data set  
Logrank Test p-value: 0.0235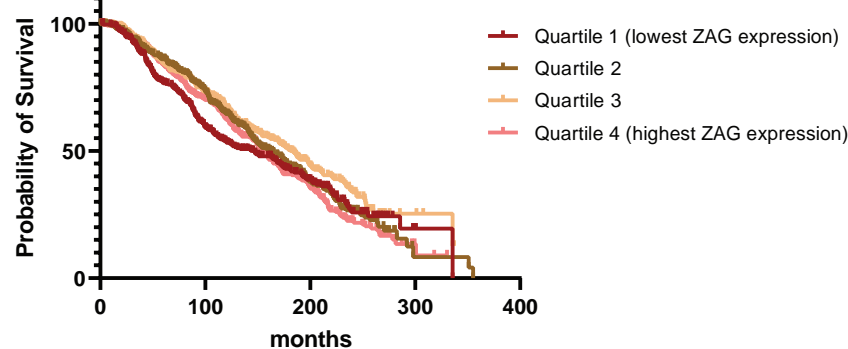

F

## all Breast Cancer - survival by ZAG expression

Breast Invasive Carcinoma (TCGA, Nature 2012) data set  
Logrank Test p-value: 0.0126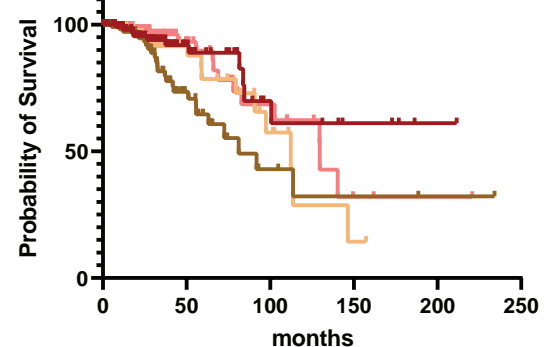Breast Cancer (METABRIC, Nature 2012 & Nat Commun 2016) data set  
Logrank Test p-value: 0.3007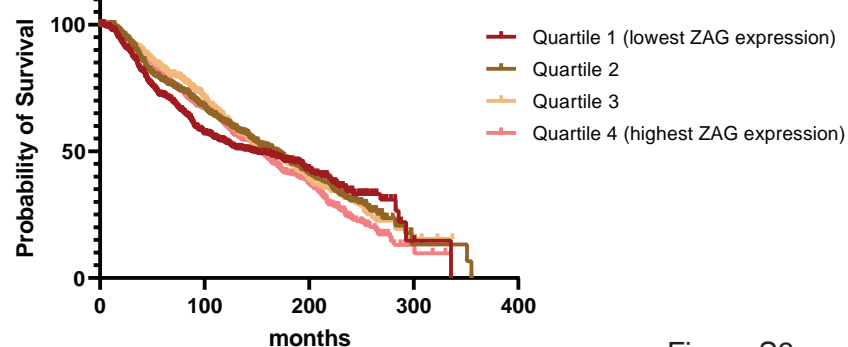

Figure S3

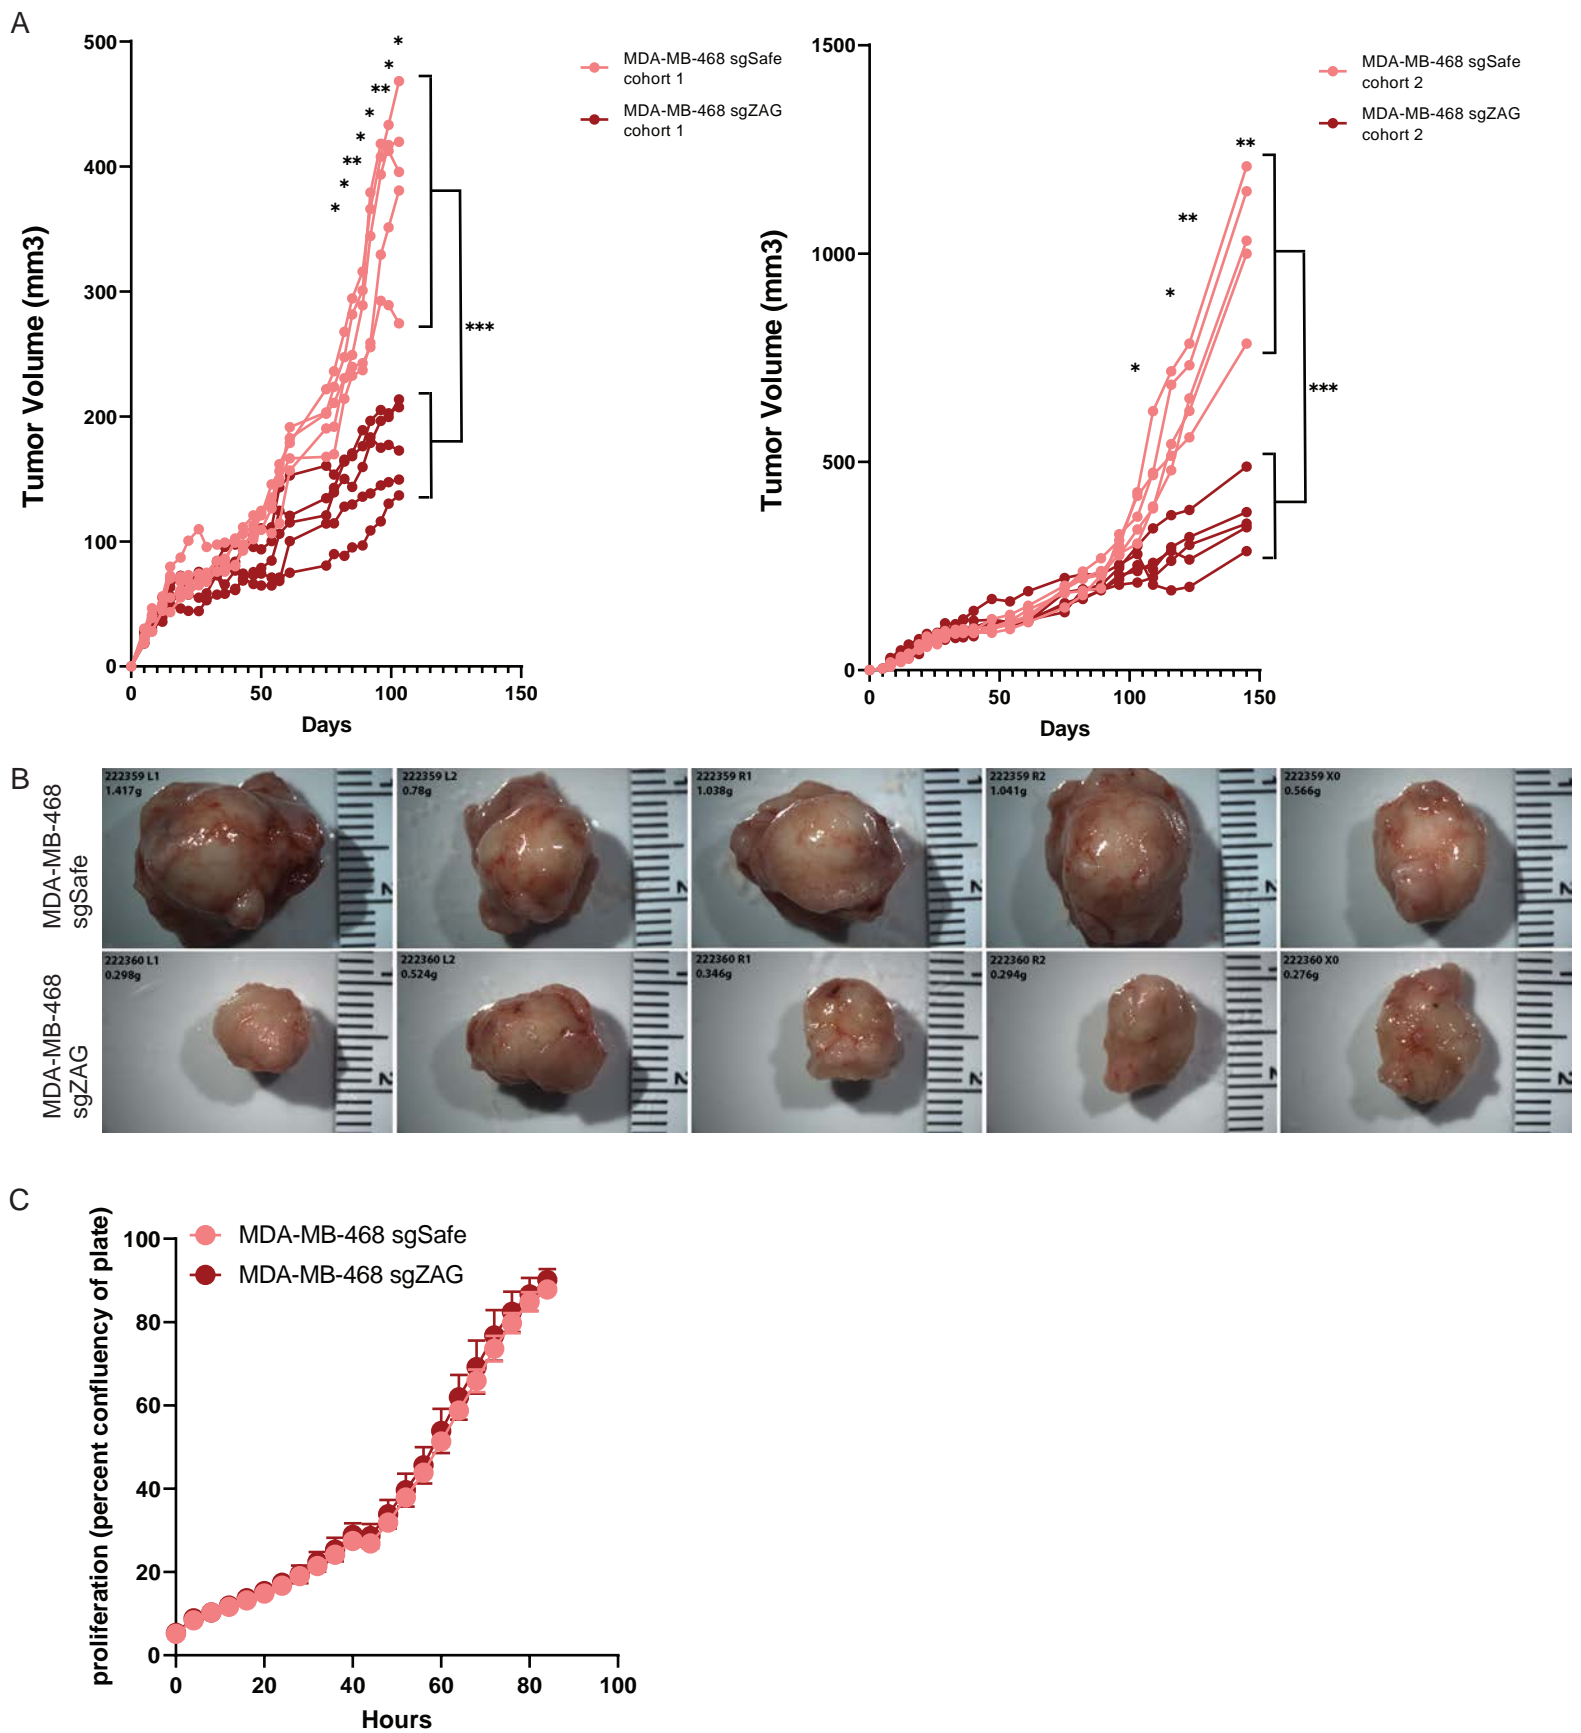

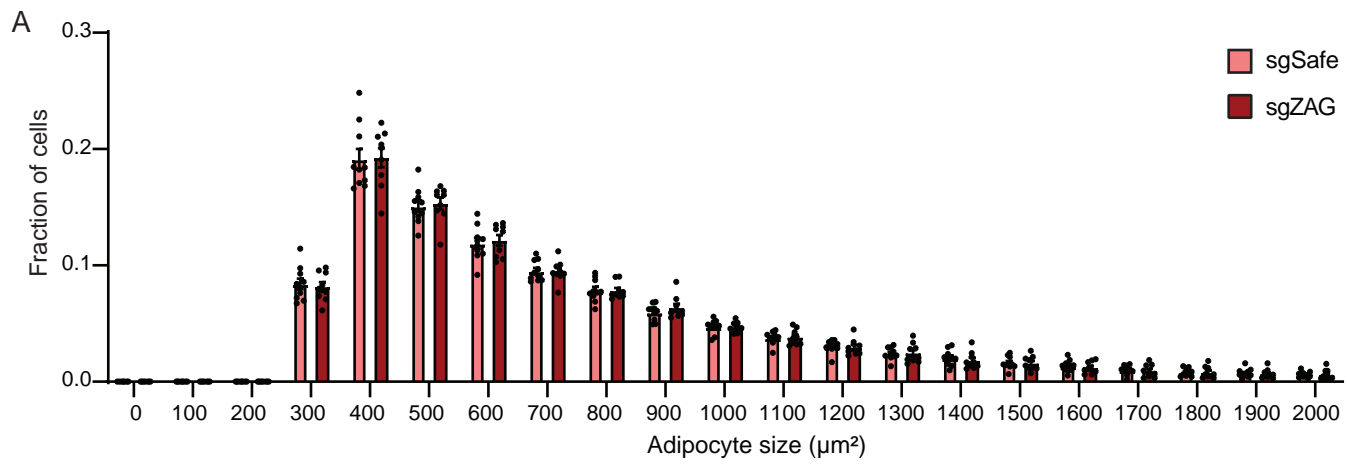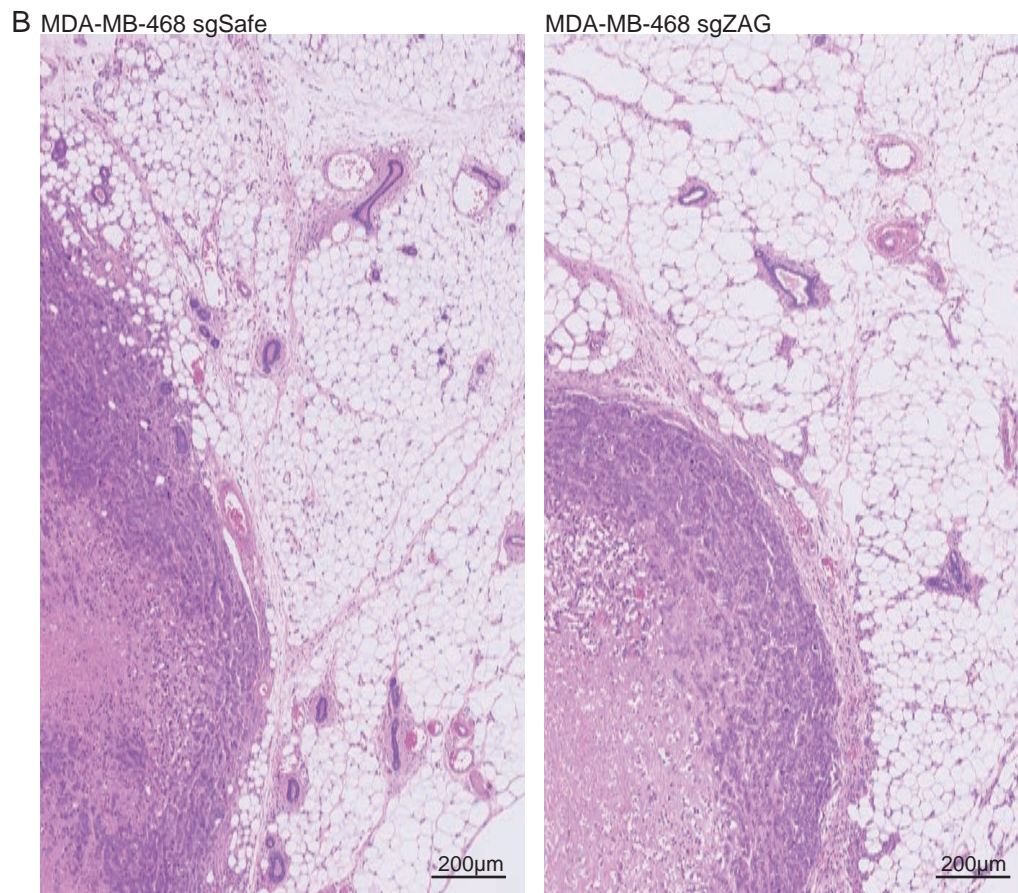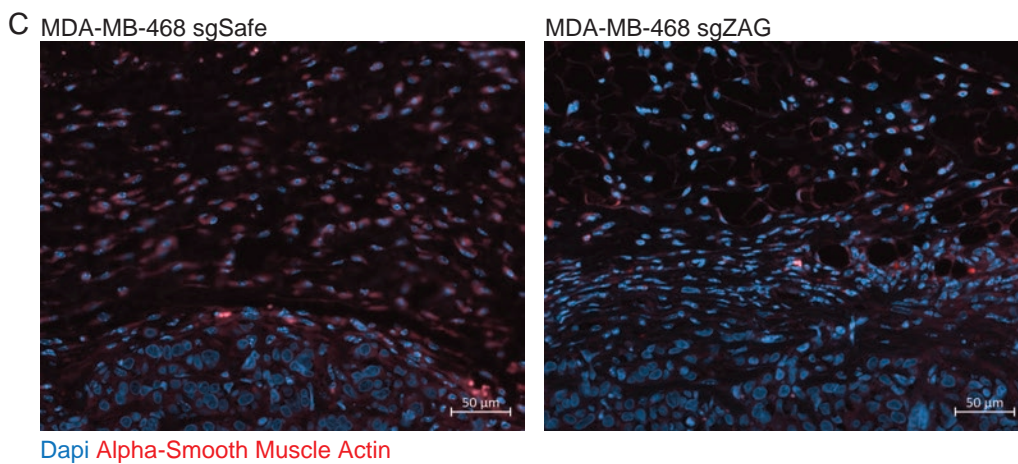

Figure 5
