# Supplementary material for: Zinc Alpha-2-Glycoprotein (ZAG/AZGP1) secreted by triple-negative breast cancer promotes tumor microenvironment fibrosis
Source: PubMed Central journal article supplement — bioRxiv. 2024 Mar 7:2024.03.04.583349. Preprint. [Version 1] doi: 10.1101/2024.03.04.583349 (PMC10942361; doi:10.1101/2024.03.04.583349), 2024-03-07
Supplement: NIHPP2024.03.04.583349v1-supplement-2.pdf [file NIHPP2024.03.04.583349v1-supplement-2.pdf]

**Supplemental Table 1: Secretome proteomics**

**Supplemental Table 2: Primers used**
